# Supplementary material
Source: Springer Nature journal article supplement (https://www.springermedizin.de/resource/supplementary/13051_2010_106_MOESM7_ESM.pdf/9669950)

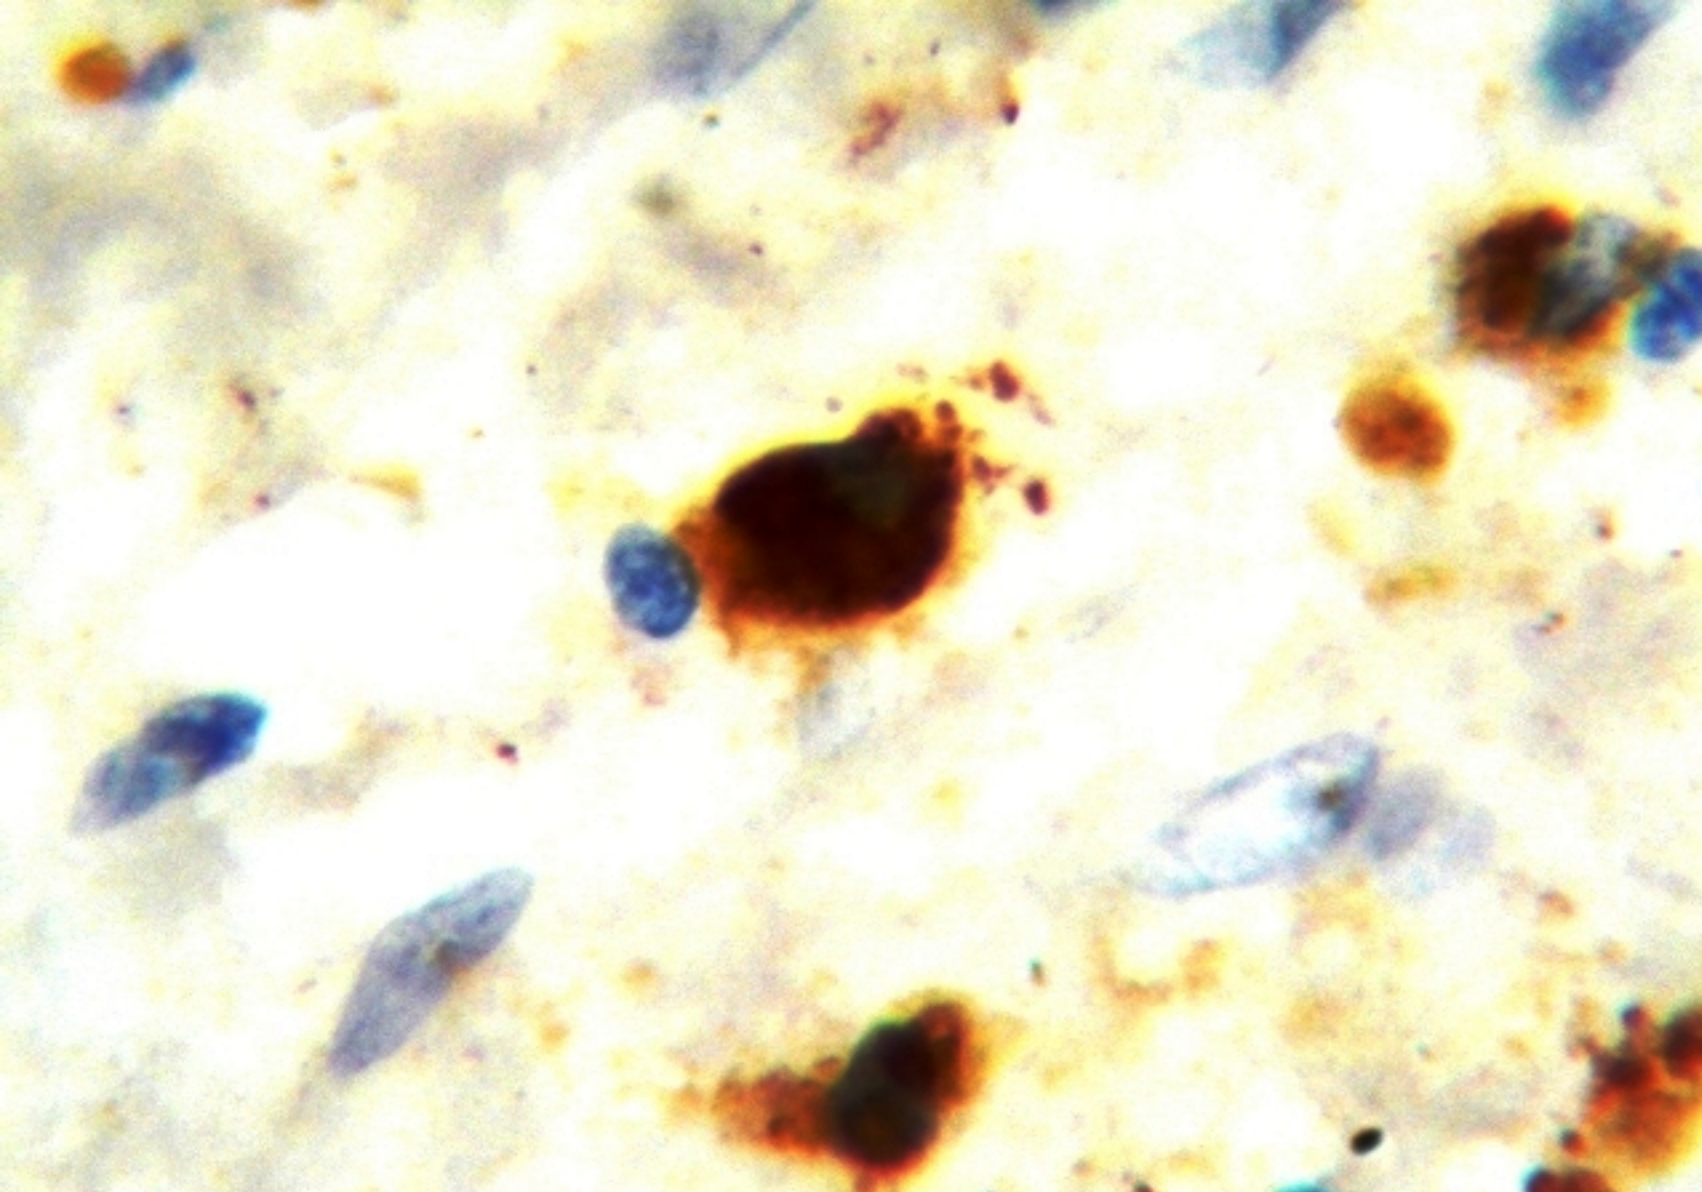

Supplement: MOESM7 [file 9669950]
